# Supplementary material for: Safety of Antipsychotic Polypharmacy Versus Monotherapy in a Nationwide Cohort of 61,889 Patients With Schizophrenia
Source: Atypon-hosted journal article supplement (doi:10.1176/appi.ajp.20220446), 2023-03-22

Data supplement for Taipale et al., Safety of Antipsychotic Polypharmacy Versus Monotherapy in a Nationwide Cohort of 61,889 Patients With Schizophrenia. *Am J Psychiatry* (doi: 10.1176/appi.ajp.20220446)

- Table S1.** Defined daily doses (DDD) determined by World Health Organization
- Table S2.** Risk of outcomes associated with polypharmacy when compared with the same dose monotherapy use (reference) when clozapine has been excluded from both categories. Adjusted Hazard Ratios (HRs) with 95% confidence intervals (CIs) and p-values from within-individual model. DDD: Defined Daily Dose.
- Table S3.** Risk of non-psychiatric and cardiovascular hospitalization associated with polypharmacy when compared with the same dose monotherapy use, when first 30 days are excluded from each exposure. Adjusted Hazard Ratios (HRs) with 95% confidence intervals (CIs) and p-values from within-individual model. DDD: Defined Daily Dose.
- Table S4.** Risk of non-psychiatric and cardiovascular hospitalization associated with monotherapy when compared with non-use of antipsychotics in different dose categories, stratified by the use of antipsychotic polypharmacy during the follow-up. Adjusted Hazard Ratios (HRs) with 95% confidence intervals (CIs) and p-values from within-individual model. DDD: Defined Daily Dose.
- Table S5.** The risk of outcomes associated with the highest doses of specific monotherapies when compared with polypharmacy of the same antipsychotics used with the highest dose category ( $\geq 1.6$  DDD/day) in within-individual model.
- Table S6.** Risk of psychiatric hospitalization associated with specific monotherapy and polypharmacy dose categories in comparison with no antipsychotic use, and head-to-head comparison of specific polypharmacy dose categories with the corresponding monotherapy dose categories in within-individual models. Adjusted Hazard Ratios (HRs) with 95% confidence intervals (CIs). DDD: Defined Daily Dose.
- Figure S1.** Study design and time-varying exposure

**TABLE S1.** Defined daily doses (DDDs) determined by World Health Organization  
([https://www.whooc.no/ddd/definition\\_and\\_general\\_considera/](https://www.whooc.no/ddd/definition_and_general_considera/))

|                                | DDD value as<br>mg/day |
|--------------------------------|------------------------|
| <b>Second generation orals</b> |                        |
| Aripiprazole oral              | 15.0                   |
| Clozapine oral                 | 300                    |
| Olanzapine oral                | 10.0                   |
| Quetiapine oral                | 400                    |
| Risperidone oral               | 5.0                    |
| Sertindole oral                | 16.0                   |
| Ziprasidone oral               | 80.0                   |
| <b>Second generation LAIs</b>  |                        |
| Olanzapine LAI                 | 10.0                   |
| Paliperidone LAI               | 2.5                    |
| Risperidone LAI                | 2.7                    |
| Aripiprazole LAI               | 13.3                   |

Paliperidone LAI refers to once-monthly injection.

**TABLE S2.** Risk of outcomes associated with polypharmacy when compared with the same dose monotherapy use (reference) when clozapine has been excluded from both categories. Adjusted Hazard Ratios (HRs) with 95% confidence intervals (CIs) and p-values from within-individual model. DDD: Defined Daily Dose.

| <b>Dose group</b>                      | <b>aHR (95% CI)</b> | <b>p-value</b> |
|----------------------------------------|---------------------|----------------|
| <b>Non-psychiatric hospitalization</b> |                     |                |
| <0.4                                   | 1.03 (0.98-1.09)    | 0.2387         |
| 0.4-<0.6                               | 0.93 (0.88-0.97)    | 0.0027         |
| 0.6-<0.9                               | 0.89 (0.86-0.93)    | <.0001         |
| 0.9-<1.1                               | 0.93 (0.88-0.98)    | 0.0032         |
| 1.1-<1.4                               | 0.84 (0.80-0.88)    | <.0001         |
| 1.4-<1.6                               | 0.87 (0.82-0.93)    | <.0001         |
| ≥1.6                                   | 0.82 (0.79-0.85)    | <.0001         |
| <b>Cardiovascular hospitalization</b>  |                     |                |
| <0.4                                   | 0.95 (0.80-1.14)    | 0.607          |
| 0.4-<0.6                               | 0.95 (0.80-1.13)    | 0.569          |
| 0.6-<0.9                               | 0.91 (0.79-1.06)    | 0.221          |
| 0.9-<1.1                               | 0.94 (0.78-1.13)    | 0.5007         |
| 1.1-<1.4                               | 0.81 (0.68-0.97)    | 0.0232         |
| 1.4-<1.6                               | 0.88 (0.69-1.12)    | 0.2977         |
| ≥1.6                                   | 0.84 (0.74-0.96)    | 0.0105         |

**TABLE S3.** Risk of non-psychiatric and cardiovascular hospitalization associated with polypharmacy when compared with the same dose monotherapy use, when first 30 days are excluded from each exposure. Adjusted Hazard Ratios (HRs) with 95% confidence intervals (CIs) and p-values from within-individual model. DDD: Defined Daily Dose.

| Dose category (DDDs/day)               | Monotherapy  |        | Polypharmacy |        | aHR (95% CI)     | p-value |
|----------------------------------------|--------------|--------|--------------|--------|------------------|---------|
|                                        | Person-years | Events | Person-years | Events |                  |         |
| <b>Non-psychiatric hospitalization</b> |              |        |              |        |                  |         |
| <0.4                                   | 63766        | 19822  | 7501         | 2533   | 1.11 (1.04-1.18) | 0.0013  |
| 0.4-<0.6                               | 38197        | 8749   | 12185        | 3291   | 1.02 (0.96-1.08) | 0.6198  |
| 0.6-<0.9                               | 50925        | 10220  | 21646        | 5528   | 0.98 (0.93-1.02) | 0.2924  |
| 0.9-<1.1                               | 35900        | 6456   | 14246        | 3368   | 1.00 (0.94-1.06) | 0.8662  |
| 1.1-<1.4                               | 29272        | 5197   | 22343        | 5117   | 0.93 (0.89-0.99) | 0.0141  |
| 1.4-<1.6                               | 13438        | 2426   | 13254        | 2910   | 0.93 (0.87-1.01) | 0.068   |
| ≥1.6                                   | 46277        | 9139   | 119538       | 28077  | 0.94 (0.90-0.97) | 0.0007  |
| <b>Cardiovascular hospitalization</b>  |              |        |              |        |                  |         |
| <0.4                                   | 63766        | 2866   | 7501         | 344    | 1.01 (0.83-1.24) | 0.8983  |
| 0.4-<0.6                               | 38197        | 1155   | 12185        | 437    | 1.09 (0.89-1.33) | 0.4011  |
| 0.6-<0.9                               | 50925        | 1113   | 21646        | 601    | 1.03 (0.86-1.23) | 0.7442  |
| 0.9-<1.1                               | 35900        | 636    | 14246        | 390    | 1.03 (0.83-1.28) | 0.8005  |
| 1.1-<1.4                               | 29272        | 490    | 22343        | 490    | 0.97 (0.78-1.20) | 0.7529  |
| 1.4-<1.6                               | 13438        | 228    | 13254        | 310    | 1.06 (0.78-1.45) | 0.6925  |
| ≥1.6                                   | 46277        | 824    | 119538       | 2313   | 0.96 (0.81-1.13) | 0.6084  |

**TABLE S4.** Risk of non-psychiatric and cardiovascular hospitalization associated with monotherapy when compared with non-use of antipsychotics in different dose categories, stratified by the use of antipsychotic polypharmacy during the follow-up. Adjusted Hazard Ratios (HRs) with 95% confidence intervals (CIs) and p-values from within-individual model. DDD: Defined Daily Dose.

|                                        | Ever polypharmacy<br>N=42042 |              | Never polypharmacy<br>N=19487 |              | Ever<br>polypharmacy |         | Never<br>polypharmacy |         |
|----------------------------------------|------------------------------|--------------|-------------------------------|--------------|----------------------|---------|-----------------------|---------|
|                                        | Events                       | Person-years | Events                        | Person-years | aHR (95% CI)         | p-value | aHR (95% CI)          | p-value |
| <b>Non-psychiatric hospitalization</b> |                              |              |                               |              |                      |         |                       |         |
| <0.4                                   | 16274                        | 51786        | 8188                          | 18718        | 1.08 (1.05-1.12)     | <0.0001 | 1.03 (0.98-1.08)      | 0.2866  |
| 0.4-<0.6                               | 8309                         | 33194        | 3162                          | 10849        | 1.06 (1.02-1.10)     | 0.0068  | 1.00 (0.94-1.07)      | 0.9440  |
| 0.6-<0.9                               | 10503                        | 46338        | 3233                          | 13822        | 1.09 (1.05-1.13)     | <0.0001 | 1.08 (1.00-1.15)      | 0.0386  |
| 0.9-<1.1                               | 6885                         | 32884        | 1991                          | 10416        | 1.05 (1.01-1.10)     | 0.0155  | 0.99 (0.92-1.08)      | 0.8702  |
| 1.1-<1.4                               | 6376                         | 29793        | 1671                          | 9259         | 1.16 (1.11-1.21)     | <0.0001 | 1.14 (1.04-1.24)      | 0.0039  |
| 1.4-<1.6                               | 3414                         | 15059        | 728                           | 4330         | 1.18 (1.12-1.25)     | <0.0001 | 1.11 (0.98-1.25)      | 0.0909  |
| ≥1.6                                   | 12867                        | 51437        | 2801                          | 12769        | 1.38 (1.33-1.44)     | <0.0001 | 1.38 (1.27-1.50)      | <0.0001 |
| <b>Cardiovascular hospitalization</b>  |                              |              |                               |              |                      |         |                       |         |
| <0.4                                   | 2118                         | 48867        | 1437                          | 22123        | 1.08 (0.97-1.21)     | 0.1733  | 1.03 (0.90-1.17)      | 0.6816  |
| 0.4-<0.6                               | 1024                         | 32517        | 469                           | 11693        | 1.03 (0.90-1.18)     | 0.7052  | 0.98 (0.81-1.19)      | 0.8188  |
| 0.6-<0.9                               | 1104                         | 45856        | 416                           | 14512        | 0.98 (0.86-1.13)     | 0.8140  | 1.02 (0.83-1.26)      | 0.8459  |
| 0.9-<1.1                               | 672                          | 32682        | 205                           | 10755        | 1.10 (0.94-1.29)     | 0.2229  | 0.88 (0.65-1.17)      | 0.3735  |
| 1.1-<1.4                               | 616                          | 29682        | 135                           | 9467         | 1.12 (0.95-1.32)     | 0.1839  | 0.84 (0.60-1.18)      | 0.3248  |
| 1.4-<1.6                               | 300                          | 15022        | 67                            | 4412         | 1.29 (1.03-1.62)     | 0.0264  | 0.61 (0.38-0.99)      | 0.0460  |
| ≥1.6                                   | 1161                         | 51274        | 254                           | 13119        | 1.50 (1.29-1.74)     | <0.0001 | 1.55 (1.15-2.11)      | 0.0044  |

**TABLE S5.** The risk of outcomes associated with the highest doses of specific monotherapies when compared with polypharmacy of the same antipsychotics used with the highest dose category ( $\geq 1.6$  DDD/day) in within-individual model. The reference value is each two-drug combination and monotherapies of those two drugs are compared with that. Five most common antipsychotics were chosen for comparisons. CLZ=clozapine, OLA=olanzapine, QUE=quetiapine, RIS=risperidone, ARI=aripiprazole. Cardiovascular (CV) hospitalization associated with RIS-ARI could not be analyzed due to lack of events (sparsity of data). The results of combinations differing statistically significantly from both of its monotherapy components in the same patients are indicated with bold. The only monotherapy showing nominally statistically significantly lower risk of hospitalization was olanzapine when compared with clozapine-olanzapine polypharmacy for non-psychiatric hospitalization (level of significance  $p < 0.05$ ).

|                                          | Non-psychiatric hospitalization<br>HR (95% CI) | CV hospitalization<br>HR (95% CI) |
|------------------------------------------|------------------------------------------------|-----------------------------------|
| CLZ-OLA $\geq 1.6$ DDDs/day as reference |                                                |                                   |
| CLZ $\geq 1.6$ DDDs/day monotherapy      | 0.88 (0.77-1.01)                               | 2.26 (0.88-5.81)                  |
| OLA $\geq 1.6$ DDDs/day monotherapy      | <b>0.85 (0.74-0.96)</b>                        | 1.83 (0.73-4.55)                  |
| CLZ-QUE $\geq 1.6$ DDDs/day as reference |                                                |                                   |
| CLZ $\geq 1.6$ DDDs/day monotherapy      | 1.16 (1.00-1.34)                               | 0.84 (0.31-2.27)                  |
| QUE $\geq 1.6$ DDDs/day monotherapy      | 1.14 (0.97-1.34)                               | 0.78 (0.28-2.19)                  |
| CLZ-RIS $\geq 1.6$ DDDs/day as reference |                                                |                                   |
| CLZ $\geq 1.6$ DDDs/day monotherapy      | 0.92 (0.78-1.10)                               | 2.54 (0.81-7.95)                  |
| RIS $\geq 1.6$ DDDs/day monotherapy      | 1.14 (0.91-1.42)                               | 2.96 (0.88-9.97)                  |
| CLZ-ARI $\geq 1.6$ DDDs/day as reference |                                                |                                   |
| CLZ $\geq 1.6$ DDDs/day monotherapy      | <b>1.24 (1.11-1.38)</b>                        | 1.73 (0.82-3.64)                  |
| ARI $\geq 1.6$ DDDs/day monotherapy      | <b>1.35 (1.10-1.65)</b>                        | 1.50 (0.52-4.37)                  |
| OLA-QUE $\geq 1.6$ DDDs/day as reference |                                                |                                   |
| OLA $\geq 1.6$ DDDs/day monotherapy      | 1.06 (0.97-1.16)                               | <b>2.33 (1.35-4.01)</b>           |
| QUE $\geq 1.6$ DDDs/day monotherapy      | 1.10 (0.98-1.23)                               | <b>2.72 (1.41-5.24)</b>           |
| OLA-RIS $\geq 1.6$ DDDs/day as reference |                                                |                                   |
| OLA $\geq 1.6$ DDDs/day monotherapy      | <b>1.15 (1.02-1.31)</b>                        | 1.20 (0.67-2.16)                  |
| RIS $\geq 1.6$ DDDs/day monotherapy      | <b>1.48 (1.22-1.79)</b>                        | 1.74 (0.81-3.74)                  |
| OLA-ARI $\geq 1.6$ DDDs/day as reference |                                                |                                   |
| OLA $\geq 1.6$ DDDs/day monotherapy      | 1.08 (0.94-1.23)                               | 0.99 (0.51-1.91)                  |
| ARI $\geq 1.6$ DDDs/day monotherapy      | 1.23 (0.99-1.52)                               | 1.07 (0.38-3.02)                  |
| RIS-QUE $\geq 1.6$ DDDs/day as reference |                                                |                                   |
| RIS $\geq 1.6$ DDDs/day monotherapy      | 1.41 (1.15-1.73)                               | 1.96 (0.91-4.25)                  |
| QUE $\geq 1.6$ DDDs/day monotherapy      | 1.13 (0.97-1.33)                               | 1.59 (0.78-3.23)                  |
| ARI-QUE $\geq 1.6$ DDDs/day as reference |                                                |                                   |
| ARI $\geq 1.6$ DDDs/day monotherapy      | 1.23 (0.99-1.53)                               | 1.02 (0.36-2.87)                  |
| QUE $\geq 1.6$ DDDs/day monotherapy      | 1.11 (0.95-1.30)                               | 1.10 (0.52-2.33)                  |
| RIS-ARI $\geq 1.6$ DDDs/day as reference |                                                |                                   |
| RIS $\geq 1.6$ DDDs/day monotherapy      | 1.37 (0.93-2.04)                               | NA                                |
| ARI $\geq 1.6$ DDDs/day monotherapy      | 1.22 (0.81-1.82)                               | NA                                |

**TABLE S6.** Risk of psychiatric hospitalization associated with specific monotherapy and polypharmacy dose categories in comparison with no antipsychotic use, and head-to-head comparison of specific polypharmacy dose categories with the corresponding monotherapy dose categories in within-individual models. Adjusted Hazard Ratios (HRs) with 95% confidence intervals (CIs). DDD: Defined Daily Dose.

| Dose group (DDDs/ day) | Users, N | Person-years | Events | Compared with non-use of antipsychotics | Head-to-head comparison of polypharmacy dose categories with the corresponding monotherapy dose categories |
|------------------------|----------|--------------|--------|-----------------------------------------|------------------------------------------------------------------------------------------------------------|
|                        |          |              |        | Adjusted HR (95% CI)                    | Adjusted HR (95% CI)                                                                                       |
| <b>Polypharmacy</b>    |          |              |        |                                         |                                                                                                            |
| <0.4                   | 5530     | 8275         | 1085   | 0.57 (0.52-0.62)                        | 0.87 (0.80-0.95)                                                                                           |
| 0.4-<0.6               | 9871     | 13641        | 2112   | 0.48 (0.46-0.51)                        | 0.88 (0.83-0.94)                                                                                           |
| 0.6-<0.9               | 17336    | 24785        | 4830   | 0.47 (0.45-0.49)                        | 0.92 (0.88-0.96)                                                                                           |
| 0.9-<1.1               | 17046    | 17198        | 4018   | 0.47 (0.45-0.49)                        | 1.00 (0.96-1.05)                                                                                           |
| 1.1-<1.4               | 22426    | 27291        | 7061   | 0.46 (0.45-0.48)                        | 0.90 (0.87-0.94)                                                                                           |
| 1.4-<1.6               | 19577    | 17184        | 4881   | 0.47 (0.45-0.49)                        | 0.86 (0.82-0.90)                                                                                           |
| ≥1.6                   | 32556    | 137636       | 58214  | 0.57 (0.56-0.58)                        | 0.86 (0.84-0.88)                                                                                           |
| <b>Monotherapy</b>     |          |              |        |                                         |                                                                                                            |
| <0.4                   | 28439    | 70653        | 11591  | 0.65 (0.64-0.67)                        |                                                                                                            |
| 0.4-<0.6               | 25739    | 43919        | 7744   | 0.55 (0.53-0.57)                        |                                                                                                            |
| 0.6-<0.9               | 30652    | 59716        | 12381  | 0.51 (0.49-0.52)                        |                                                                                                            |
| 0.9-<1.1               | 26407    | 42888        | 8250   | 0.47 (0.45-0.48)                        |                                                                                                            |
| 1.1-<1.4               | 26508    | 38454        | 10030  | 0.51 (0.50-0.53)                        |                                                                                                            |
| 1.4-<1.6               | 19950    | 19060        | 5415   | 0.55 (0.53-0.57)                        |                                                                                                            |
| ≥1.6                   | 28702    | 62960        | 23145  | 0.66 (0.65-0.68)                        |                                                                                                            |

**FIGURE S1.** Study design and time-varying exposure

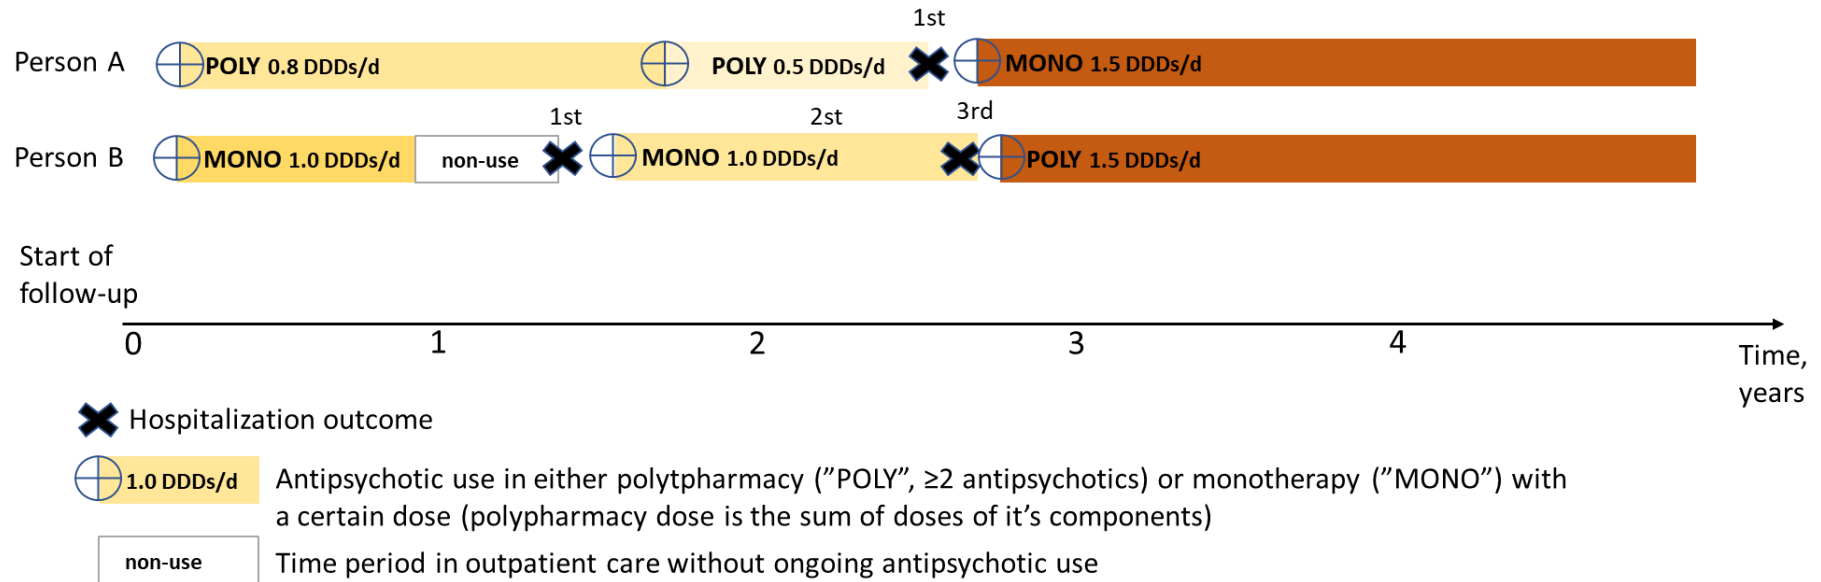

Supplement: appi.ajp.20220446.ds001.pdf [file appi.ajp.20220446.ds001.pdf]
